# Supplementary material
Source: PubMed Central journal article supplement (PMC3786587)
Supplement: NIHMS512839-supplement-SI.pdf [file NIHMS512839-supplement-SI.pdf]

## Supporting Information

Mn<sup>2+</sup> - nucleotide coordination at the myosin active site as detected by pulsed EPR.

Andrei V. Astashkin<sup>1</sup>, Yuri E. Nesmelov<sup>2,\*</sup>

<sup>1</sup>Department of Chemistry and Biochemistry, University of Arizona, Tucson, AZ 85721

<sup>2</sup>Department of Physics and Optical Science, University of North Carolina, Charlotte, NC 28223

### Structures of the nucleotides studied in this work

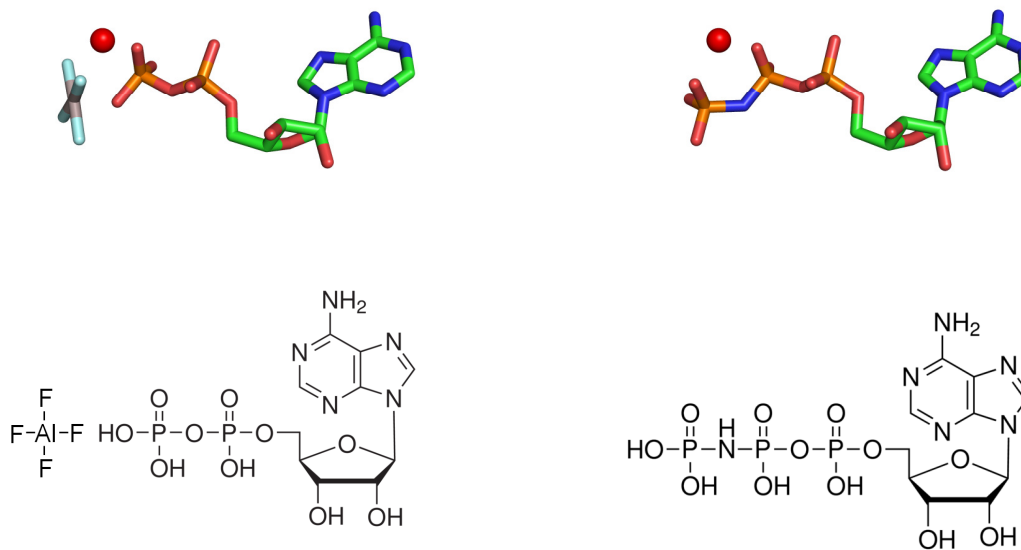

Figure S1. The structure of ADP·AlF<sub>4</sub> (C<sub>10</sub>H<sub>15</sub>N<sub>5</sub>O<sub>10</sub>P<sub>2</sub>AlF<sub>4</sub>) with the metal ion, coordinating β phosphate and AlF<sub>4</sub>.

Figure S2. The structure of AMPPNP (C<sub>10</sub>H<sub>17</sub>N<sub>6</sub>O<sub>12</sub>P<sub>3</sub>) with the metal ion, coordinating γ and β phosphates.

*Interpretation of the ligand hfi parameters observed in the complexes of high-spin transition metal ions.*

Although the relationship between the observed (effective) *hfi* constant and the true one-electron *hfi* constant in high-spin systems is well-known [1-3], the necessity to appropriately rescale the  $^{31}\text{P}$  and  $^{14(15)}\text{N}$  isotropic *hfi* constants of coordinated phosphates and nitrogens in the Mn.nucleotide complexes was missed in all of the high-resolution EPR works where such complexes were studied [4-10]. Therefore, as a reminder, we present here a simple derivation that demonstrates the general approach to obtaining such scaling factors. Let us consider the specific system at hand, the  $\text{Mn}^{2+}$  center, which has the  $d_5$  electronic configuration with the total spin  $S = 5/2$ . This total spin represents a sum of the individual spins of each of the  $d$ -electrons:

$$S = \sum_j S_j \quad (\text{S1})$$

where  $S_j = 1/2$  are the individual spins, and the simple summation implies that the multiplet with the highest possible spin is formed. The states with positive total  $S_Z$  are described by:

$$\begin{aligned} |5/2\rangle &= \alpha\alpha\alpha\alpha\alpha \\ |3/2\rangle &= \frac{1}{\sqrt{5}}(\alpha\alpha\alpha\alpha\beta + \alpha\alpha\alpha\beta\alpha + \alpha\alpha\beta\alpha\alpha + \alpha\beta\alpha\alpha\alpha + \beta\alpha\alpha\alpha\alpha) \\ |1/2\rangle &= \frac{1}{\sqrt{10}}(\alpha\alpha\alpha\beta\beta + \alpha\alpha\beta\alpha\beta + \alpha\beta\alpha\alpha\beta + \beta\alpha\alpha\alpha\beta + \alpha\alpha\beta\beta\alpha + \\ &\quad + \alpha\beta\alpha\beta\alpha + \beta\alpha\alpha\beta\alpha + \alpha\beta\beta\alpha\alpha + \beta\alpha\beta\alpha\alpha + \beta\beta\alpha\alpha\alpha) \end{aligned} \quad (\text{S2})$$

and those with the negative  $S_Z$  are obtained from the corresponding positive ones by interchanging the single-electron functions  $\alpha$  and  $\beta$ . The average values of single-electron operators  $\mathbf{S}_{\mathbf{z}k}$  (where the index  $k$  indicates any one of the five electrons) obtained from eq S2 are:

$$\begin{aligned} \langle S_{\mathbf{z}k} \rangle_{5/2} &= \langle 5/2 | \mathbf{S}_{\mathbf{z}k} | 5/2 \rangle = 1/2 = (5/2) \times 1/5 \\ \langle S_{\mathbf{z}k} \rangle_{3/2} &= \langle 3/2 | \mathbf{S}_{\mathbf{z}k} | 3/2 \rangle = 3/10 = (3/2) \times 1/5 \\ \langle S_{\mathbf{z}k} \rangle_{1/2} &= \langle 1/2 | \mathbf{S}_{\mathbf{z}k} | 1/2 \rangle = 1/10 = (1/2) \times 1/5 \end{aligned} \quad (\text{S3})$$

etc. The factor of 1/5 in eq S3 equals to  $2S$ , and the average single-electron values can be expressed as:

$$\langle S_{Zk} \rangle_{S_z} = \langle S_Z \rangle / (2S) \quad (S4)$$

Although the derivation of eq S4 was based on considering the specific case of  $S = 5$ , it is actually general and applies to the highest spin multiplets formed by any number of individual spins  $S_j = 1/2$ . In particular, it is relevant for the half-filled orbital shells of atoms and ions, *e.g.*,  $p_3$  ( $N^0$ ),  $d_5$  ( $Mn^{2+}$ ), or  $f_7$  ( $Gd^{3+}$ ).

The ligand isotropic *hfi* constants can be considered based on the model where only one of the five *d*-orbitals predominantly interacts with a given ligand, and thus only one unpaired electron delocalizes on that ligand and results in the isotropic *hfi* with the ligand nucleus. The isotropic *hfi* constant in such a model can either be expressed through the total electron spin (the experimentally observable effective *hfi* constant  $a_{ef}$ ) or using the single-electron operators (the true one-electron *hfi* constant  $a$ ):

$$H_{iso} = a_{ef} \mathbf{S}_Z \mathbf{I}_Z = a \mathbf{S}_{Zk} \mathbf{I}_Z \quad (S5)$$

where a high-field approximation is assumed. Substituting the operators by the expectation values and using eq S4, one immediately obtains:

$$a = 2S \cdot a_{ef} \quad (S6)$$

For the anisotropic *hfi*, two contributions should be considered. The first contribution comes from the (one-electron) spin density delocalized on the ligand and is treated similar to the isotropic *hfi* (eqs S5 and S6), *e.g.*,

$$H_{aniso}^{ligand} = T_{ZZef}^{ligand} \mathbf{S}_Z \mathbf{I}_Z = T_{ZZ}^{ligand} \mathbf{S}_{Zk} \mathbf{I}_Z \quad (S7)$$

(and similar terms for  $T_{ZX}$  and  $T_{ZY}$ ), which results in

$$T_{ZZ}^{ligand} = 2S \cdot T_{ZZef}^{ligand} \quad (S8)$$

The second contribution is the through-space magnetic dipole interaction of the ligand nucleus with the spin density on the central ion. In this case, all  $N = 2S$  individual unpaired electrons interact with the ligand nucleus approximately equally:

$$H_{aniso}^{central} = T_{ZZef}^{central} \mathbf{S}_Z \mathbf{I}_Z = \left( \sum_{k=1}^{2S} T_{ZZ}^{central} \mathbf{S}_{Zk} \right) \cdot \mathbf{I}_Z = T_{ZZ}^{central} \left( \sum_{k=1}^{2S} \mathbf{S}_{Zk} \right) \cdot \mathbf{I}_Z \quad (\text{S9})$$

(and similar terms for  $T_{ZX}$  and  $T_{ZY}$ ). Substituting the average values of the spin projections and using eq S4, one immediately arrives at:

$$T_{ZZ}^{central} = T_{ZZef}^{central} \quad (\text{S10})$$

Taking into account the conversion factors given by eqs S6, S8, and S10 allows one to meaningfully compare the *hfi* parameters obtained for the ligands of high-spin ions with those observed for the ligands of the  $S = 1/2$  ions. In addition, using the true isotropic *hfi* constant (eq S6) rather than the effective one results in more accurate estimates of the spin density delocalization on the ligands.

As an example, for the phosphate ligand at  $\text{Mn}^{2+}$  ion we obtained, on average,  $a_p \sim 23$  MHz (see Table 1 in the main text). Taking into account that the unpaired electron on the  $3s$  orbital of phosphorus results in the *hfi* constant of about  $1.33 \times 10^4$  MHz [11] and that the  $s$ -character of the phosphorus electronic orbitals in phosphate is about  $1/4$  ( $sp_3$  orbitals), we can estimate the spin density on phosphorus as  $\rho_p \sim 0.007$ . Such a spin density will result in the anisotropic *hfi* constant  $T_{\perp}^{ligand} \sim (-367 \text{ MHz}) \times (3/4) \times \rho_p \sim -1.9 \text{ MHz}$ , where  $-367 \text{ MHz}$  is the value of  $T_{\perp}$  that would be obtained for a pure  $p$ -orbital and  $\rho_p = 1$  [11], and  $3/4$  is the  $p$ -character of the  $sp_3$  orbital. The effective (observable) anisotropic *hfi* from this source is thus  $T_{\perp ef}^{ligand} = T_{\perp}^{ligand} / 2S \sim -0.4 \text{ MHz}$ . The ‘‘through-space’’ anisotropic *hfi* with the central ion at the distance  $R_{\text{MnP}} = 3.2\text{-}3.3 \text{ \AA}$  is  $T_{\perp ef}^{central} = T_{\perp}^{central} \sim -0.9 \text{ MHz}$ . Adding the two contributions together (with the proper account of the geometry of the Mn-O-P fragment) results in a slightly rhombic tensor  $(T_{11}, T_{22}, T_{33})_{ef} \sim (-1.1, -1.36, 2.46) \text{ MHz}$ . The two smaller components obtained by this estimate are somewhat larger than the experimental value of  $T_{\perp ef} = -0.9 \text{ MHz}$ . This discrepancy can be corrected by taking into account the spin delocalization from the Mn ion to

the ligands (*e.g.*, assuming  $\rho_{\text{Mn}} = 0.7$  results in the calculated  $T_{\perp\text{ef}}$  similar to the experimental one).

The purpose of the above discussion was only to demonstrate the general approach to the analysis of the anisotropic and isotropic *hfi* for the ligands of the high-spin ions, in particular,  $\text{Mn}^{2+}$ . While this analysis is rather approximate, it is qualitatively better than simply estimating the Mn – P distance using a point dipole approximation. As follows from this analysis, the fact that the point-dipolar anisotropic *hfi* (for  $\rho_{\text{Mn}} = 1$ ) is similar to the experimental one is purely coincidental because the spin density delocalization into the phosphate orbitals gives a noticeable (~40%) contribution into the total anisotropic *hfi*.

## References

1. Kent, T. A., B. H. Huynh, and E. Munck. (1980) Iron-sulfur proteins: spin-coupling model for three-iron clusters, *Proc Natl Acad Sci U S A* 77, 6574-6576.
2. Stich, T. A., J. W. Whittaker, and R. D. Britt. (2010) Multifrequency EPR studies of manganese catalases provide a complete description of proteinaceous nitrogen coordination, *J Phys Chem B* 114, 14178-14188.
3. Owen, J., and J. H. M. Thornley. (1966) Covalent bonding and magnetic properties of transition metal ions, *Rep. Prog. Phys.* 29, 675-728.
4. Schneider, B., C. Sigalat, T. Amano, and J. L. Zimmermann. (2000) Evidence for changes in the nucleotide conformation in the active site of  $\text{H}^+$ -ATPase as determined by pulsed EPR spectroscopy, *Biochemistry* 39, 15500-15512.
5. Zoleo, A., G. Lippe, S. Contessi, M. Brustolon, F. Dabbeni-Sala, and A. L. Maniero. (2007) Conformational role of the divalent metal in bovine heart mitochondrial F1-ATPase: an electron spin echo envelope modulation study, *Biochemistry* 46, 13443-13450.
6. Potapov, A., and D. Goldfarb. (2006) Quantitative Characterization of the  $\text{Mn}^{2+}$  Complexes of ADP and ATPgS by W-band ENDOR, *Appl. Magn. Reson.* 30, 461-472.
7. Petersen, J., C. Gessner, K. Fisher, C. J. Mitchell, D. J. Lowe, and W. Lubitz. (2005)  $\text{Mn}^{2+}$ -adenosine nucleotide complexes in the presence of the nitrogenase iron-protein: detection of conformational rearrangements directly at the nucleotide binding site by EPR and 2D-ESEEM (two-dimensional electron spin-echo envelope modulation spectroscopy), *Biochem J* 391, 527-539.
8. Hoogstraten, C. G., C. V. Grant, T. E. Horton, V. J. DeRose, and R. D. Britt. (2002) Structural Analysis of Metal Ion Ligation to Nucleotides and Nucleic Acids Using Pulsed EPR Spectroscopy., *J. Am. Chem. Soc.* 124, 834-842.
9. Morrissey, S. R., T. E. Horton, C. V. Grant, C. G. Hoogstraten, R. D. Britt, and V. J. DeRose. (1999)  $\text{Mn}^{2+}$ -nitrogen interactions in RNA probed by electron spin-echo envelope modulation spectroscopy: Application to the hammerhead ribozyme, *J. Am. Chem. Soc.* 121, 9215-9218.
10. Buy, C., T. Matsui, S. Andrianambinintsoa, C. Sigalat, G. Girault, and J. L. Zimmermann. (1996) Binding sites for Mg(II) in  $\text{H}^+$ -ATPase from Bacillus PS3 and in the alpha 3 beta 3 gamma

- subcomplex studied by one-dimensional ESEEM and two-dimensional HYSCORE spectroscopy of oxovanadium(IV) complexes: a possible role for beta-His-324, *Biochemistry* 35, 14281-14293.
11. Morton, J. R., and K. F. Preston. (1978) Atomic parameters for paramagnetic resonance data, *J. Magn. Reson.* 30, 577-582.
